# Supplementary material
Source: publisher site journal article supplement (https://www.dovepress.com/article/403134)
Supplement: Supplementary file 1 [file get_supplementary_file.php]

## Supplementary material

### **Paeonol promotes reendothelialization after vascular injury through activating of c-Myc/VEGFR2 signaling pathway**

Yang Wang <sup>1\*</sup>, Zheng Wang <sup>1\*</sup>, Xiao Wu <sup>1\*</sup>, Song Zhu <sup>2\*</sup>, Qiru Guo <sup>1</sup>, Zhong Jin <sup>1</sup>,  
Zixian Chen <sup>3</sup>, Delai Zhang <sup>2</sup>, Wangming Hu <sup>1</sup>, Huan Xu <sup>1</sup>, Liangqin Shi <sup>1</sup>, Lan Yang <sup>1</sup>,  
Yong Wang <sup>1</sup>

<sup>1</sup> College of Basic Medicine, Chengdu University of Traditional Chinese Medicine, Chengdu, China.

<sup>2</sup> Hospital of Chengdu University of Traditional Chinese Medicine, Chengdu, China.

<sup>3</sup> School of Ethnic Medicine, Chengdu University of Traditional Chinese Medicine, Chengdu, China.

\* These authors have contributed equally to this work and share first authorship

Address for Correspondence:

Yong Wang, Ph.D

Basic Medical College, Chengdu University of Traditional Chinese Medicine,  
Chengdu, China

Email: yongwang1008@hotmail.com (wangyong@cdutcm.edu.cn)

## Supplementary Figure 1

### List of primer sequences used for Real Time PCR in the study

| <i>Gene Name</i> | <i>Species</i> | <i>Sequence</i>                   |
|------------------|----------------|-----------------------------------|
| VEGF121          | Human          | F:5'-CCCTGATGAGATCGAGTACATCTT-3'  |
|                  | Human          | R:5'-GCCTCGGCTTGTCCACATTTT-3'     |
| VEGF165          | Human          | F:5'-CCCTGATGAGATCGAGTACATCTT-3'  |
|                  | Human          | R:5'-AGCAAGGCCACAGGGATTT-3'       |
| VEGF189          | Human          | F:5'-CCCTGATGAGATCGAGTACATCTT-3'  |
|                  | Human          | R:5'-AACGCTCCAGGACTTATACCG-3'     |
| VEGFR1           | Human          | F:5'-TCTCACACATCGACAAACCAATACA-3' |
|                  | Human          | R:5'-GGTAGCAGTACAATTGAGGACAAGA-3' |
| VEGFR2           | Human          | F:5'-GCAGGGGACAGAGGGACTTG-3'      |
|                  | Human          | R:5'-GAGGCCATCGCTGCACTCA-3'       |
| VEGFR3           | Human          | F:5'-GACAGCTACAAGTACGAGCATCTG-3'  |
|                  | Human          | R:5'-CGTTCTTGCAGTCGAGCAGAA-3'     |
| c-Myc            | Human          | F:5'-AGCGACTCTGAGGAGGAACAAG-3'    |
|                  | Human          | R:5'-GTGGCACCTCTTGAGGACCA-3'      |
| Tie2             | Human          | F:5'-TTGAAGTGGAGAGAAGGTCTG-3'     |
|                  | Human          | R:5'-GTTGACTCTAGCTCGGACCAC-3'     |
| Caspase-3        | Human          | F:5'-AGTAGATGGTTTGAGCCTGAGC-3'    |
|                  | Human          | R:5'-GTATGGAGAAATGGGCTGTAGG-3'    |
| CD31             | Human          | F:5'-TTAGCCTGAGGAATTGCTGTGTT-3'   |
|                  | Human          | R:5'-AGCTGTAGGAGGAGAATCCATC-3'    |
| CD148            | Human          | F:5'-AGTACACACGGCCCAGCAAT-3'      |
|                  | Human          | R:5'-GAGGCGTCATCAAAGTTCTGC-3'     |
| ANGPT1           | Human          | F:5'-AACATGGGCAATGTGCCTACACTT-3'  |
|                  | Human          | R:5'-CATTCTGCTGTATCTGGGCCATCT-3'  |
| ANGPT2           | Human          | F:5'-CAGATTTTGGACCAGACCAGTGA-3'   |
|                  | Human          | R:5'-TCAATGATGGAATTTTGCCTTGGA-3'  |
| NRP1             | Human          | F:5'-CAGAAAAGCCCACGGTCAT-3'       |
|                  | Human          | R:5'-CAGCCAAATTCACAGTTAAAACC-3'   |
| GJC              | Human          | F:5'-AGCTGTAGGAAGGAGAATCCATC-3'   |
|                  | Human          | R:5'-TGCAAACGCATCATAACAGACA-3'    |
| VWF              | Human          | F:5'-GTCGAGCTGCACAGTGACATG-3'     |
|                  | Human          | R:5'-GCACCATAAACGTTGACTTCCA-3'    |
| RHOA             | Human          | F:5'-GAAGAGGCTGGACTCGGATT-3'      |
|                  | Human          | R:5'-AGCAAGCATGTCTTTCCACA-3'      |
| PCNA             | Human          | F:5'-TCCGCCACCATGTTCGA-3'         |
|                  | Human          | R:5'-TATCCCAGCAGGCCTCGTT-3'       |
| P14arf           | Human          | F:5'-ATGGTGCGCAGGTTCTTGG-3'       |
|                  | Human          | R:5'-TGCGGGCATGGTACTGCCTC-3'      |
| P15ink4b         | Human          | F:5'-CGCAGACCCTGCCACTCT-3'        |
|                  | Human          | R:5'-AGGCATCGCGCACGTC-3'          |

| <i>Gene Name</i> | <i>Species</i> | <i>Sequence</i>                   |
|------------------|----------------|-----------------------------------|
| P16ink4a         | Human          | F:5'-CCCAACGCACCGAATAGTTA-3'      |
|                  | Human          | R:5'-ACCAGCGTGTCCAGGAAG-3'        |
| P18ink4c         | Human          | F:5'-CATCATGCAGCCTGGTTAGG-3'      |
|                  | Human          | R:5'-GCTGGCCGTGTGCTTCAC-3'        |
| P19arf           | Human          | F:5'-CCCTCGTGCTGAGCTACTGA-3'      |
|                  | Human          | R:5'-ACCACCAGCGTGTCCAGGAA-3'      |
| P27kip1          | Human          | F:5'-TGGAGAAGCACTGCAGAGAC-3'      |
|                  | Human          | R:5'-GCGTGTCCCTCAGAGTTAGCC-3'     |
| CCND1            | Human          | F:5'-GTGCTGCGAAGTGGAAACC-3'       |
|                  | Human          | R:5'-ATCCAGGTGGCGACGATCT-3'       |
| MMP9             | Human          | F:5'-CCTGGGCAGATTCCAAACCT-3'      |
|                  | Human          | R:5'-GCAAGTCTTCCGAGTAGTTTTGGAT-3' |
| VE-Cadherin      | Human          | F:5'-GAGCCGCCGCCGCAGGAAG-3'       |
|                  | Human          | R:5'-CGTGAGCATCCAGCAGTGGTAGC-3'   |
| Collagen1        | Human          | F:5'-ATGCCTGGTGAACGTGGT-3'        |
|                  | Human          | R:5'-AGGAGAGCCATCAGCACCT-3'       |
| Fibronectin      | Human          | F:5'-CCGCCGAATGTAGGACAAGA-3'      |
|                  | Human          | R:5'-TGCCAACAGGATGACATGAAA-3'     |
| β-actin          | Human          | F:5'-CGAGGCCAGAGCAAGAGAG-3'       |
|                  | Human          | R:5'-CTCGTAGATGGGCACAGTGTG-3'     |

## Supplementary figure 2

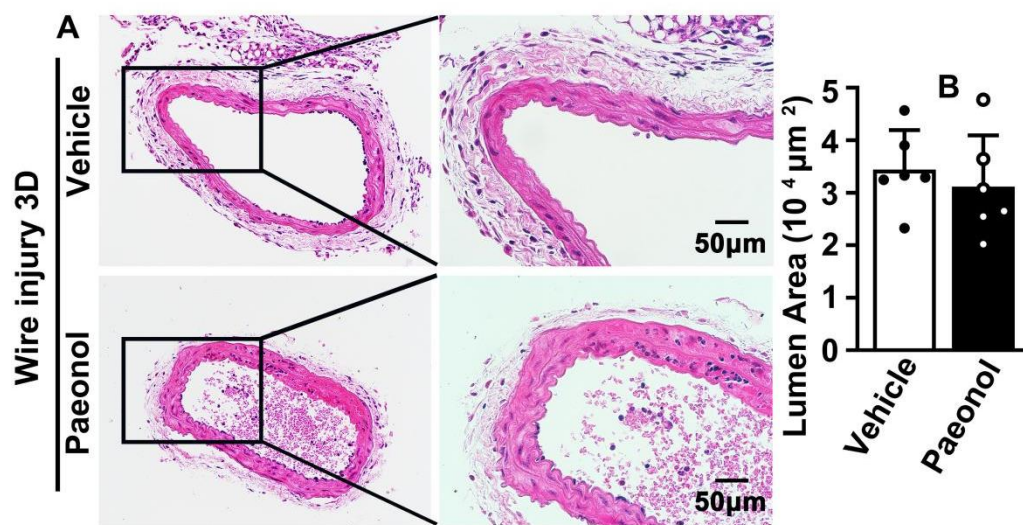

**Supplementary Figure 2.** (A) Representative images of H&E staining of left carotid artery catheter guide wires injury after Paeonol treatment for 3 days. Whole images exhibited in left and high resolution of corresponding areas exhibited in right. (Scale bar: 50 μm). (B) Quantification of lumen area (n=6). Data presented as mean ± SEM.

### Supplementary figure 3

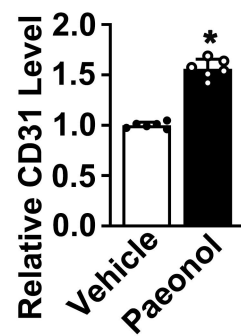

**Supplementary Figure 3.** The quantification of relative CD31 expression on slides from carotid artery after Paeonol treatment for 7 days (n=6). Data presented as mean  $\pm$  SEM, \*P < 0.05 was considered significant.

Supplementary figure 4

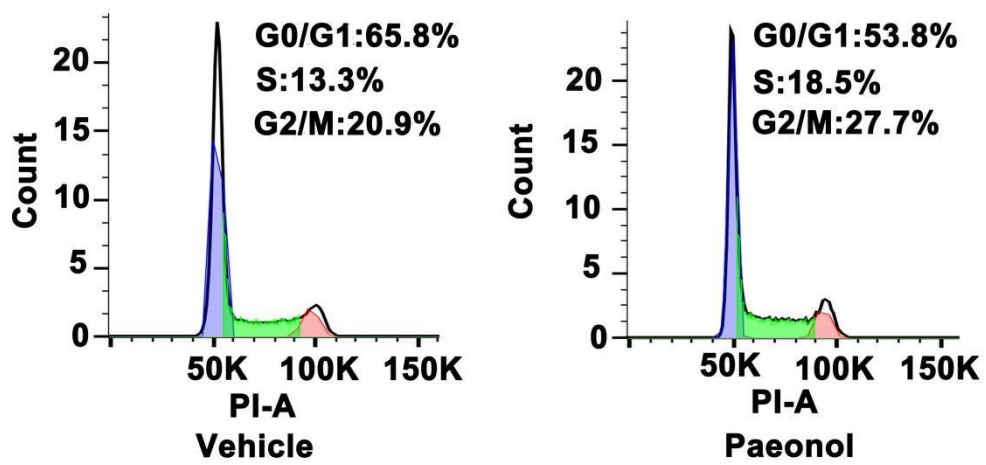

Supplementary Figure 4. Cell cycle of HUVEC-C was evaluated by flow cytometry analysis after Paeonol treatment following PI staining.

**Supplementary figure 5**

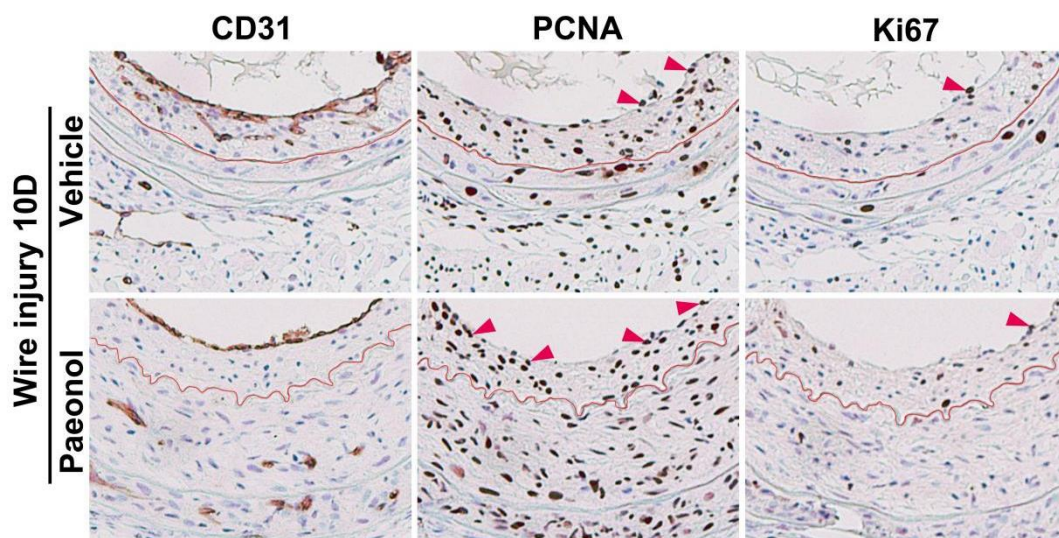

**Supplementary Figure 5.** IHC staining against CD31, PCNA and Ki67

antibodies on slides from left carotid arteries after Paeonol treatment for 10 days (Scale bar: 50  $\mu$ m).

Supplementary figure 6

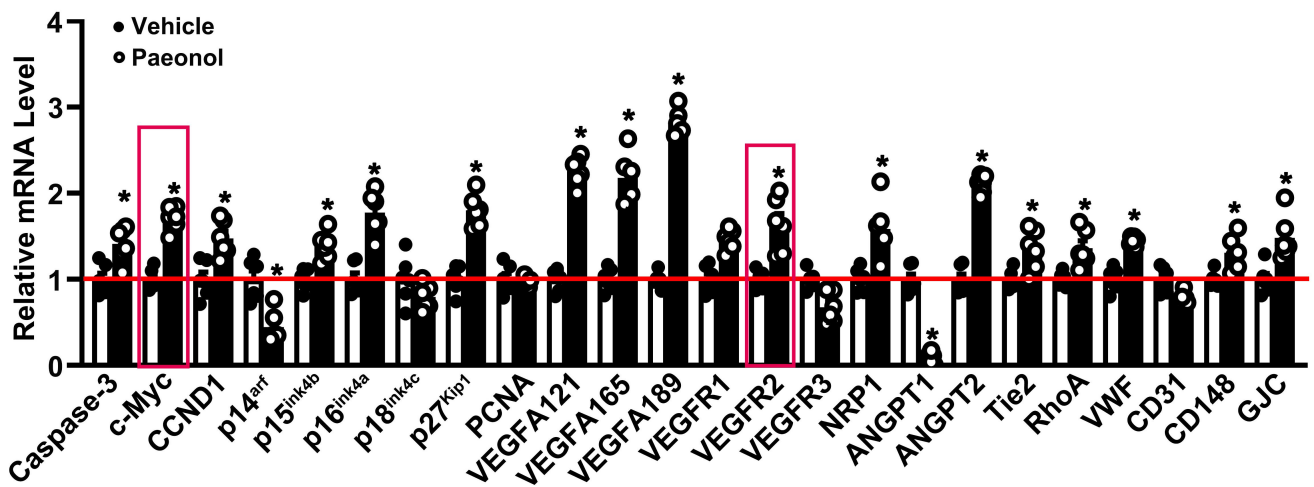

**Supplementary Figure 6.** HUVECs were treated with Paeonol, and Real Time PCR performed to determine angiogenesis related genes (n=6, unpaired *t* test). Quantitative data presented as mean  $\pm$  SEM, \*P < 0.05 was considered significant.



Supplementary figure 7

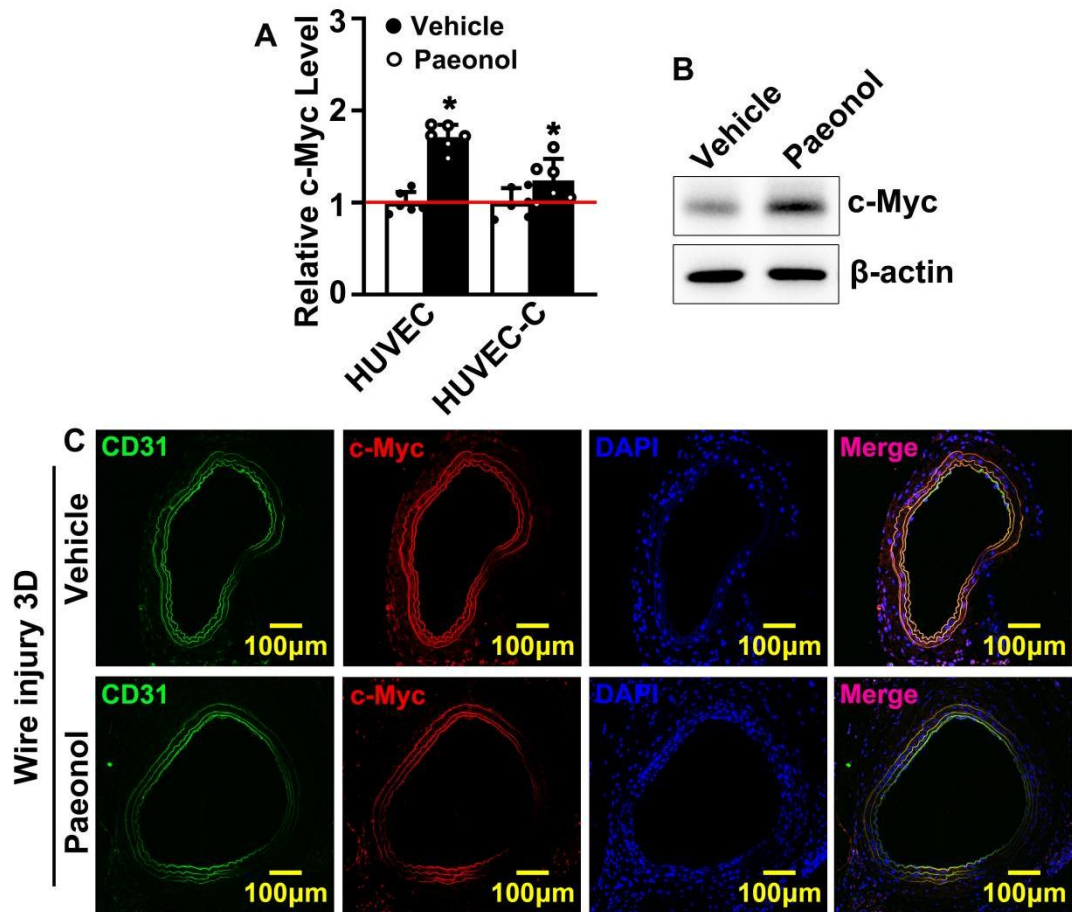

**Supplementary Figure 7.** (A) The mRNA level of c-Myc in HUVECs and HUVEC-Cs was analyzed by Real Time PCR after Paeonol treatment (n=6, unpaired *t*-test). (B) Western blot analysis of c-Myc protein expression in HUVEC-Cs after Paeonol treatment for 48 hours. (C) IF staining against c-Myc antibody performed on carotid artery after Paeonol treatment for 3 days (Scale bar: 100  $\mu$ m). Quantitative data presented as mean  $\pm$  SEM, \*P < 0.05 was considered significant.

### Supplementary figure 8

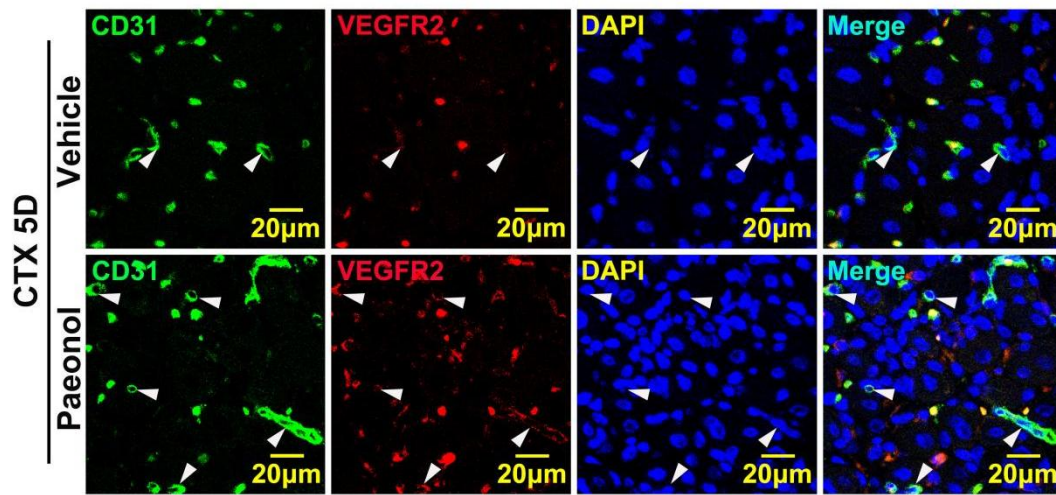

**Supplementary Figure 8.** IF staining against CD31 and VEGFR2 antibodies in skeletal muscle which damaged by cardiotoxin injection following Paeonol treatment for 5 days (Scale bar: 20 μm).

### Supplementary figure 9

| Complex   | Interface area (Å <sup>2</sup> ) | Solvation free energy (kcal/mol) |
|-----------|----------------------------------|----------------------------------|
| Complex 1 | 1049.5                           | -12.6                            |
| Complex 2 | 1001.1                           | -12.2                            |
| Complex 3 | 1123.4                           | -11.6                            |
| Complex 4 | 1000.4                           | -12.2                            |
| Complex 5 | 1069.4                           | -12.4                            |

**Supplementary Figure 9.** Interface area and solvation free energy of complexes obtained from c-Myc and VEGFR2 protein docking.

Supplementary figure 10

HUVEC-C

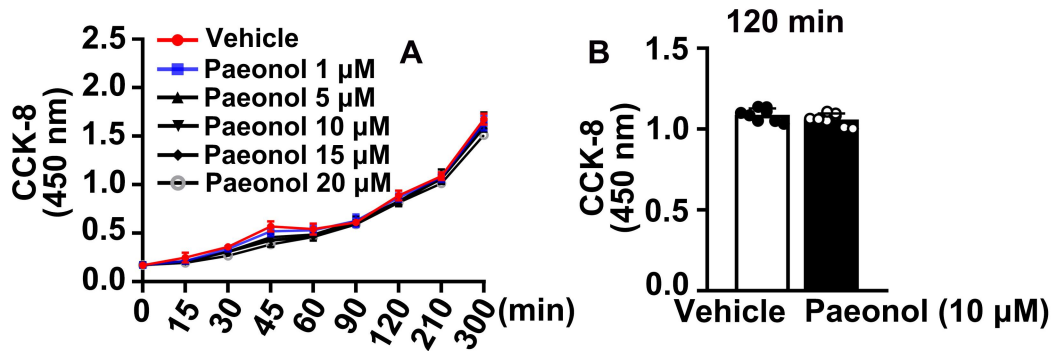

HUVEC

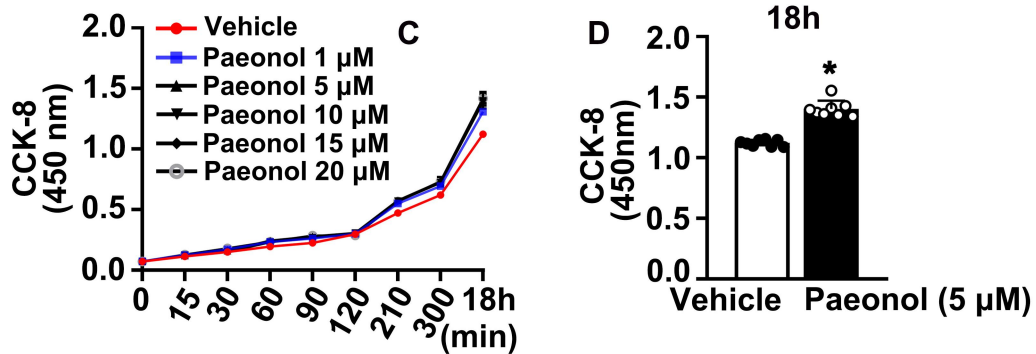

Supplementary Figure 10. (A, B) HUVEC-C treated with different doses of Paeonol and cell viability determined by CCK8 assay. (C, D) HUVEC treated with different doses of Paeonol and cell viability determined by CCK8 assay. Quantitative data presented as mean  $\pm$  SEM, \*P < 0.05 was considered significant.
